# Supplementary material for: Tailored synthesis of nitric oxide-releasing polyurethanes using O2-protected diazeniumdiolated chain extenders
Source: Royal Society of Chemistry journal article supplement (doi:10.1039/c000152j), 2010-01-01
Supplement: c000152j.pdf [file c000152j.pdf]

**Supporting Information**  
**for**  
**Tailored Synthesis of Nitric Oxide-Releasing Polyurethanes Using  $O^2$ -  
Protected Diazeniumdiolated Chain Extenders**

Melissa M. Reynolds,<sup>†</sup> Joseph E. Saavedra,<sup>‡</sup> Brett M. Showalter<sup>§</sup>, Carlos A. Valdez,<sup>§</sup> Anna P.  
Shanklin,<sup>§</sup> Bong K. Oh,<sup>†</sup> Larry K. Keefer,<sup>§</sup> and Mark E. Meyerhoff<sup>\*,†</sup>

*Department of Chemistry, The University of Michigan, Ann Arbor, MI 48109, Basic Science  
Program, SAIC Frederick, National Cancer Institute at Frederick, Frederick, Maryland 21702,  
and Chemistry Section, Laboratory of Comparative Carcinogenesis, National Cancer Institute at  
Frederick, Frederick, Maryland 21702*

<sup>†</sup> The University of Michigan.

<sup>‡</sup> SAIC Frederick.

<sup>§</sup> National Cancer Institute.

### Table of Contents

|                                       |    |
|---------------------------------------|----|
| <sup>1</sup> H NMR <b>poly1</b> ..... | S3 |
| <sup>1</sup> H NMR <b>poly2</b> ..... | S4 |
| <sup>1</sup> H NMR <b>poly3</b> ..... | S5 |
| <sup>1</sup> H NMR <b>poly4</b> ..... | S6 |
| <sup>1</sup> H NMR <b>poly5</b> ..... | S7 |
| <sup>1</sup> H NMR <b>poly6</b> ..... | S8 |
| NO-release data <b>poly1</b> .....    | S9 |

**poly1**

STANDARD PROTON PARAMETERS  
Pulse Sequence: zgpg30  
Solvent: CDCl3  
INOVA-500 "Srt. Chem. USA. UNiCh. Edu."  
Ambient Temperature  
PULSE SEQUENCE  
Relax. delay 1.000 sec  
Pulse 40.0 degrees  
Acq. time 2.500 sec  
M 1000.000000 MHz  
N 1000.000000 MHz  
OBSERVE HI 499.9042613 MHz  
DATA PROCESSING  
FT size 65536  
Total time 0 min, 28 sec

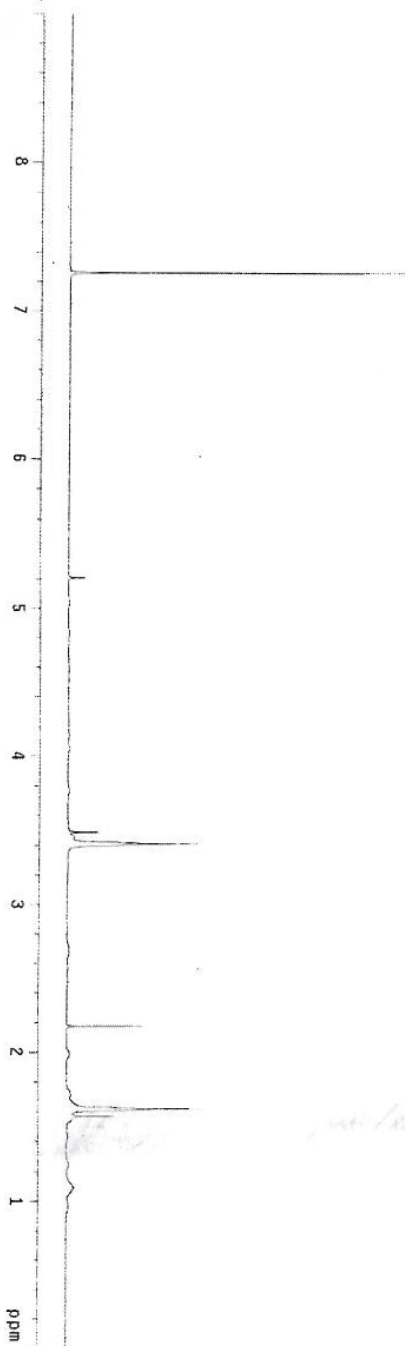

poly2

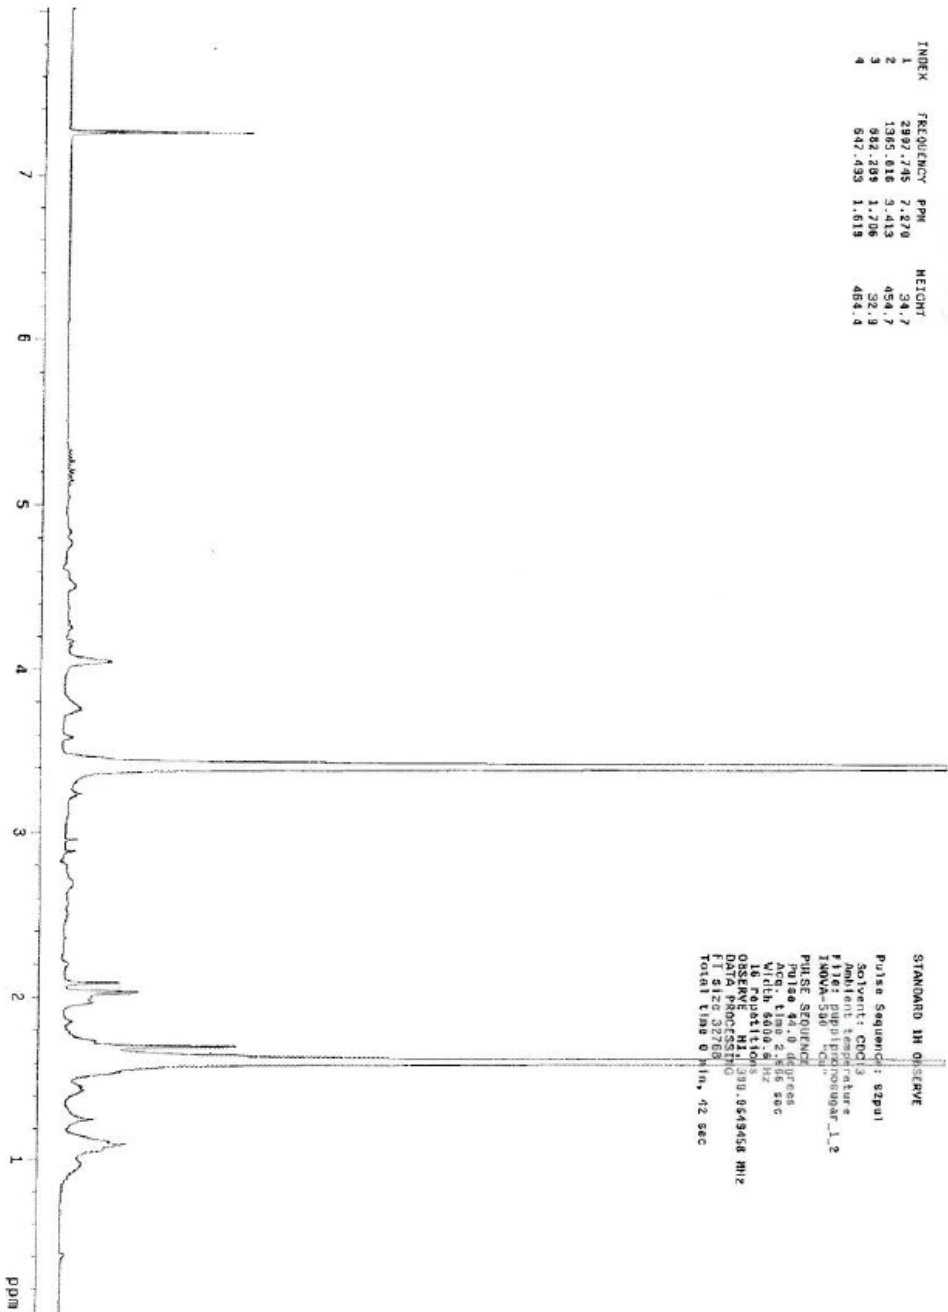

poly3

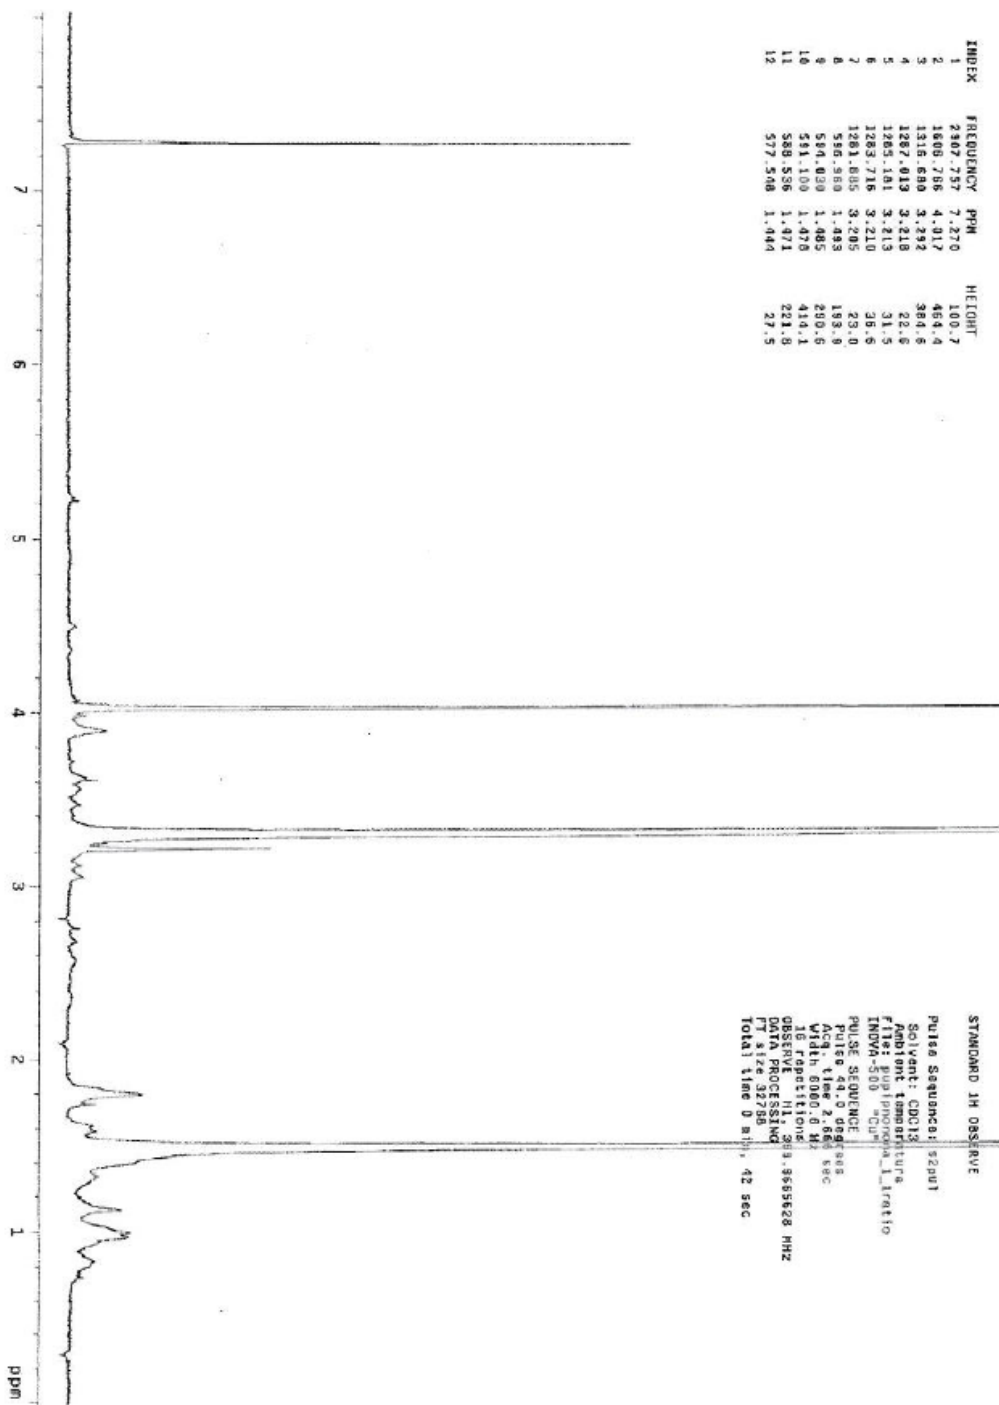

## Poly4

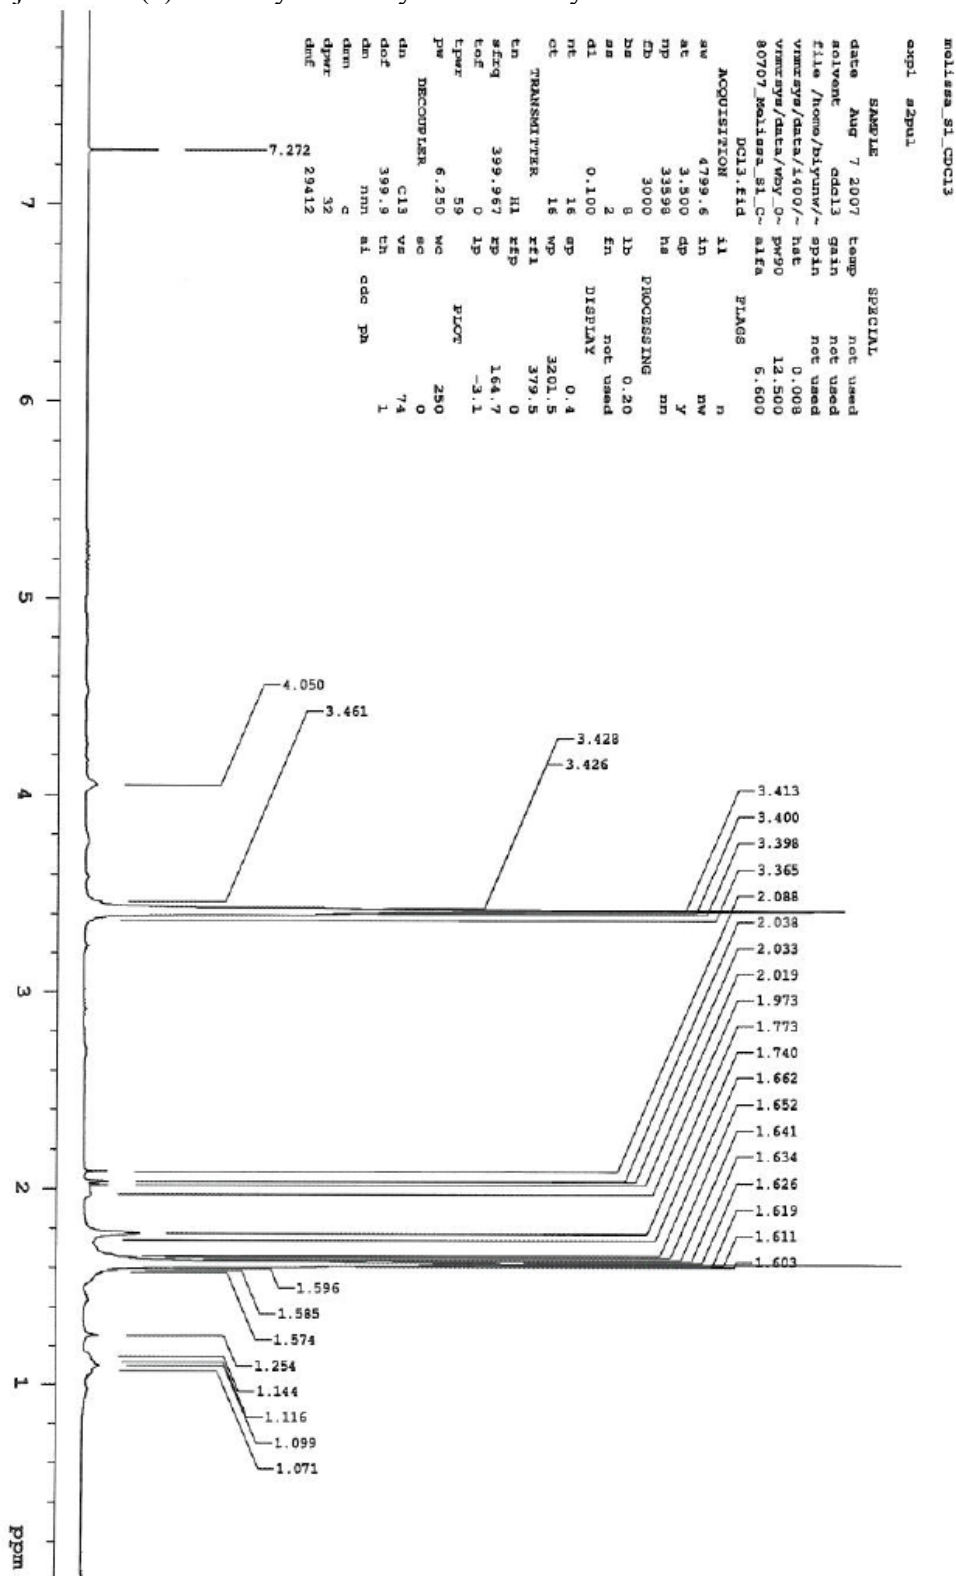

## Poly5

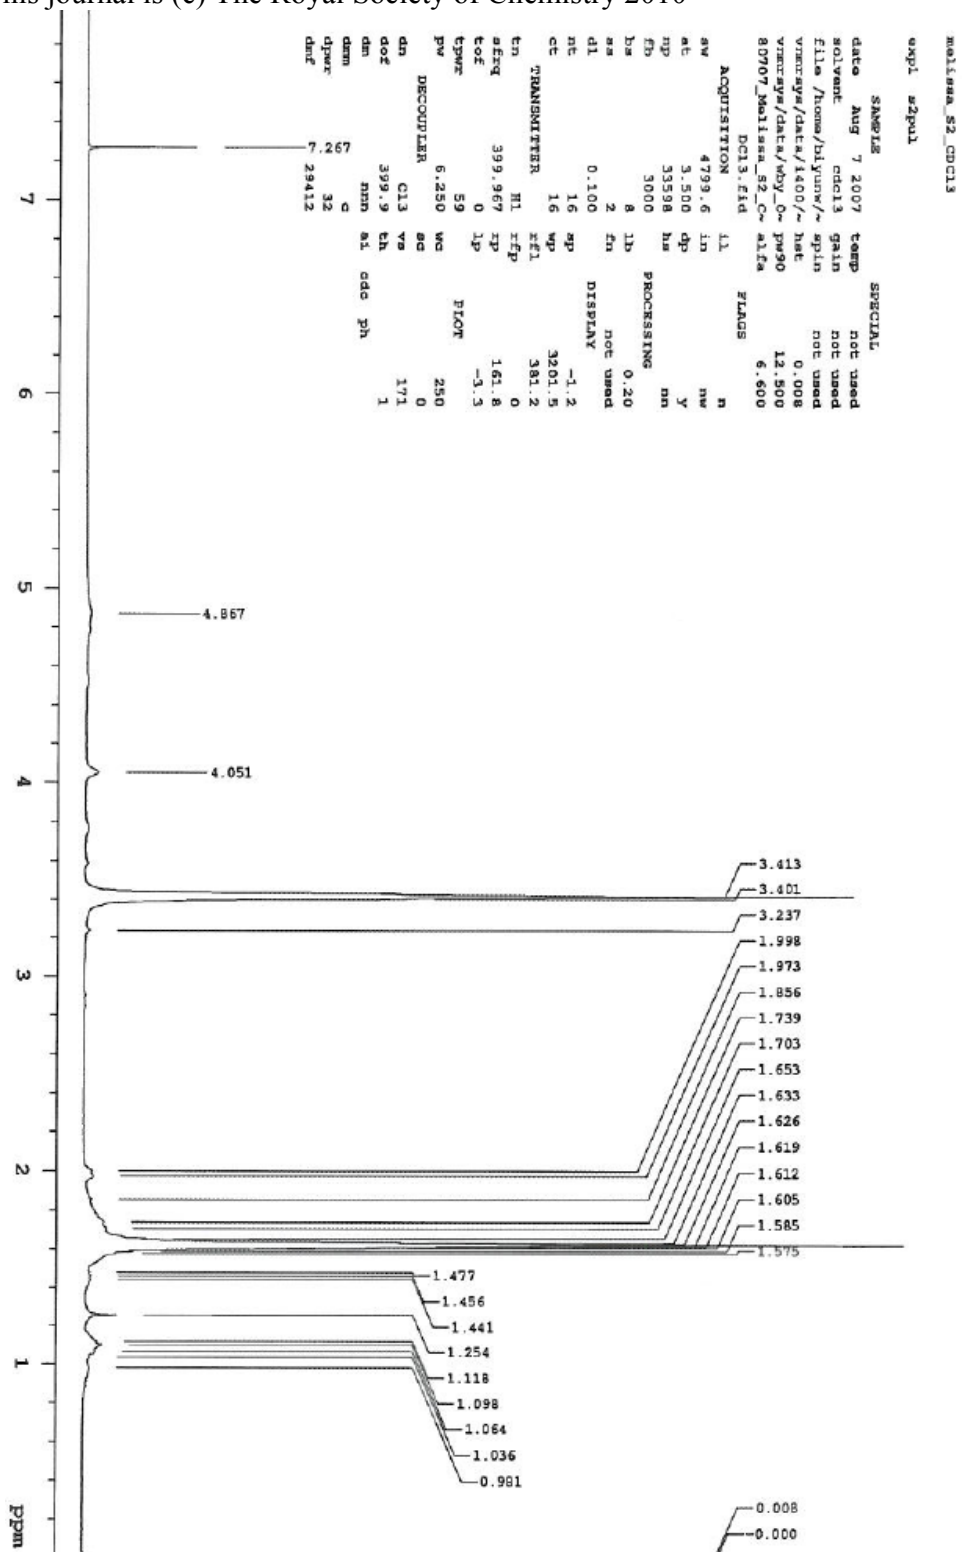

poly6

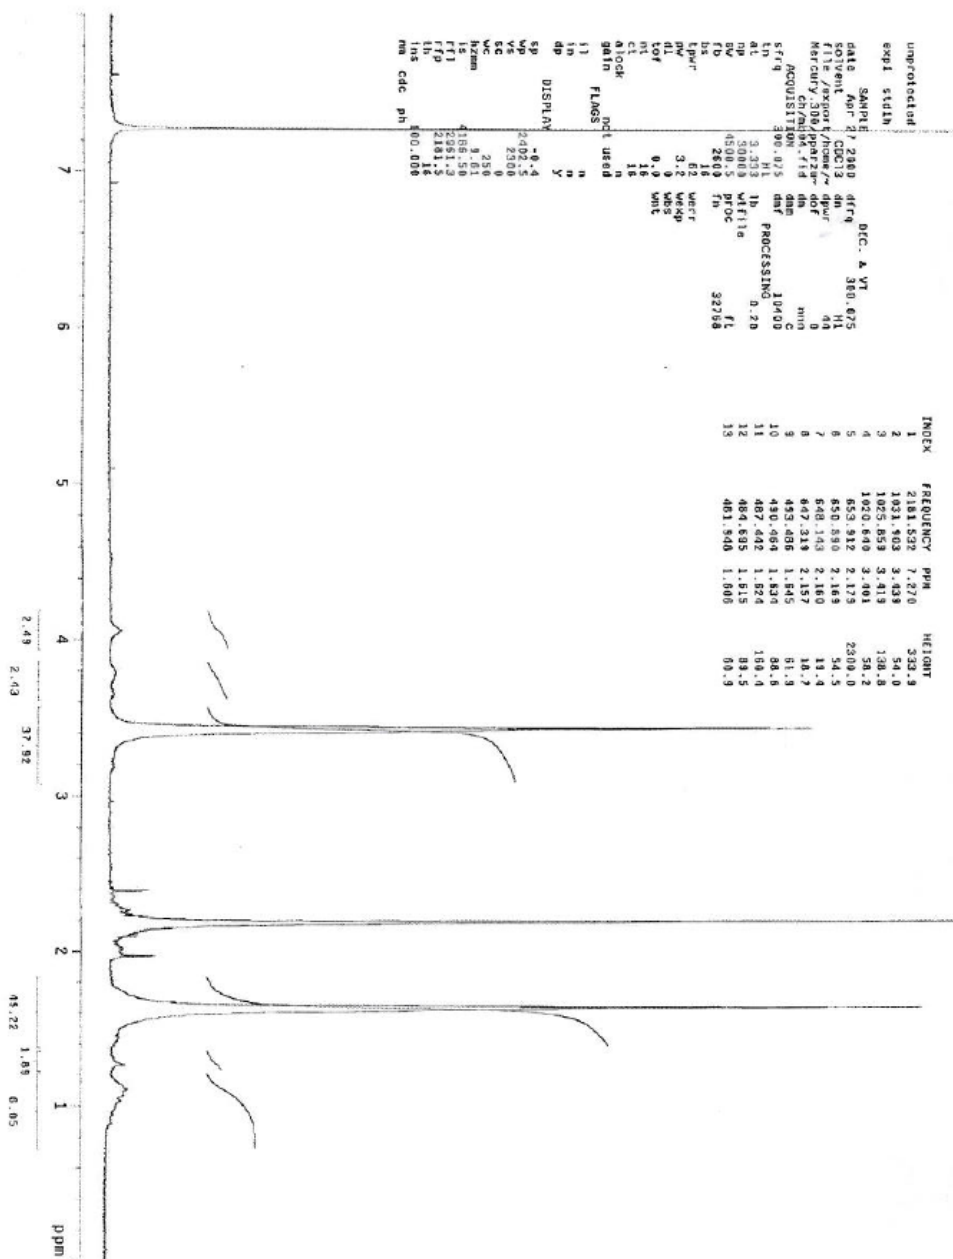

unprotected  
 exp1 STDIN  
 SAMPLE Apr 27 2080 OTC. A.YI  
 DATE Apr 27 2080 OTC. A.YI  
 FILE /export/home/~/pub/1  
 SOLVENT cdcl3 dh  
 ACQUISITION 360.075  
 SFRq 360.075  
 AL 5.303  
 NP 159883  
 PV 4500.5  
 DV 2800  
 LB 1  
 EPUR 62 wact  
 NV 3.2 wekp  
 IL 9.9 wss  
 CLY 8.9 wsc  
 NL 16 wbc  
 CL 16  
 alock pld used  
 gain FLMS  
 11 n  
 12 n  
 13 n  
 14 n  
 15 n  
 16 n  
 17 n  
 18 n  
 19 n  
 20 n  
 21 n  
 22 n  
 23 n  
 24 n  
 25 n  
 26 n  
 27 n  
 28 n  
 29 n  
 30 n  
 31 n  
 32 n  
 33 n  
 34 n  
 35 n  
 36 n  
 37 n  
 38 n  
 39 n  
 40 n  
 41 n  
 42 n  
 43 n  
 44 n  
 45 n  
 46 n  
 47 n  
 48 n  
 49 n  
 50 n  
 51 n  
 52 n  
 53 n  
 54 n  
 55 n  
 56 n  
 57 n  
 58 n  
 59 n  
 60 n  
 61 n  
 62 n  
 63 n  
 64 n  
 65 n  
 66 n  
 67 n  
 68 n  
 69 n  
 70 n  
 71 n  
 72 n  
 73 n  
 74 n  
 75 n  
 76 n  
 77 n  
 78 n  
 79 n  
 80 n  
 81 n  
 82 n  
 83 n  
 84 n  
 85 n  
 86 n  
 87 n  
 88 n  
 89 n  
 90 n  
 91 n  
 92 n  
 93 n  
 94 n  
 95 n  
 96 n  
 97 n  
 98 n  
 99 n  
 100 n  
 101 n  
 102 n  
 103 n  
 104 n  
 105 n  
 106 n  
 107 n  
 108 n  
 109 n  
 110 n  
 111 n  
 112 n  
 113 n  
 114 n  
 115 n  
 116 n  
 117 n  
 118 n  
 119 n  
 120 n  
 121 n  
 122 n  
 123 n  
 124 n  
 125 n  
 126 n  
 127 n  
 128 n  
 129 n  
 130 n  
 131 n  
 132 n  
 133 n  
 134 n  
 135 n  
 136 n  
 137 n  
 138 n  
 139 n  
 140 n  
 141 n  
 142 n  
 143 n  
 144 n  
 145 n  
 146 n  
 147 n  
 148 n  
 149 n  
 150 n  
 151 n  
 152 n  
 153 n  
 154 n  
 155 n  
 156 n  
 157 n  
 158 n  
 159 n  
 160 n  
 161 n  
 162 n  
 163 n  
 164 n  
 165 n  
 166 n  
 167 n  
 168 n  
 169 n  
 170 n  
 171 n  
 172 n  
 173 n  
 174 n  
 175 n  
 176 n  
 177 n  
 178 n  
 179 n  
 180 n  
 181 n  
 182 n  
 183 n  
 184 n  
 185 n  
 186 n  
 187 n  
 188 n  
 189 n  
 190 n  
 191 n  
 192 n  
 193 n  
 194 n  
 195 n  
 196 n  
 197 n  
 198 n  
 199 n  
 200 n  
 201 n  
 202 n  
 203 n  
 204 n  
 205 n  
 206 n  
 207 n  
 208 n  
 209 n  
 210 n  
 211 n  
 212 n  
 213 n  
 214 n  
 215 n  
 216 n  
 217 n  
 218 n  
 219 n  
 220 n  
 221 n  
 222 n  
 223 n  
 224 n  
 225 n  
 226 n  
 227 n  
 228 n  
 229 n  
 230 n  
 231 n  
 232 n  
 233 n  
 234 n  
 235 n  
 236 n  
 237 n  
 238 n  
 239 n  
 240 n  
 241 n  
 242 n  
 243 n  
 244 n  
 245 n  
 246 n  
 247 n  
 248 n  
 249 n  
 250 n  
 251 n  
 252 n  
 253 n  
 254 n  
 255 n  
 256 n  
 257 n  
 258 n  
 259 n  
 260 n  
 261 n  
 262 n  
 263 n  
 264 n  
 265 n  
 266 n  
 267 n  
 268 n  
 269 n  
 270 n  
 271 n  
 272 n  
 273 n  
 274 n  
 275 n  
 276 n  
 277 n  
 278 n  
 279 n  
 280 n  
 281 n  
 282 n  
 283 n  
 284 n  
 285 n  
 286 n  
 287 n  
 288 n  
 289 n  
 290 n  
 291 n  
 292 n  
 293 n  
 294 n  
 295 n  
 296 n  
 297 n  
 298 n  
 299 n  
 300 n  
 301 n  
 302 n  
 303 n  
 304 n  
 305 n  
 306 n  
 307 n  
 308 n  
 309 n  
 310 n  
 311 n  
 312 n  
 313 n  
 314 n  
 315 n  
 316 n  
 317 n  
 318 n  
 319 n  
 320 n  
 321 n  
 322 n  
 323 n  
 324 n  
 325 n  
 326 n  
 327 n  
 328 n  
 329 n  
 330 n  
 331 n  
 332 n  
 333 n  
 334 n  
 335 n  
 336 n  
 337 n  
 338 n  
 339 n  
 340 n  
 341 n  
 342 n  
 343 n  
 344 n  
 345 n  
 346 n  
 347 n  
 348 n  
 349 n  
 350 n  
 351 n  
 352 n  
 353 n  
 354 n  
 355 n  
 356 n  
 357 n  
 358 n  
 359 n  
 360 n  
 361 n  
 362 n  
 363 n  
 364 n  
 365 n  
 366 n  
 367 n  
 368 n  
 369 n  
 370 n  
 371 n  
 372 n  
 373 n  
 374 n  
 375 n  
 376 n  
 377 n  
 378 n  
 379 n  
 380 n  
 381 n  
 382 n  
 383 n  
 384 n  
 385 n  
 386 n  
 387 n  
 388 n  
 389 n  
 390 n  
 391 n  
 392 n  
 393 n  
 394 n  
 395 n  
 396 n  
 397 n  
 398 n  
 399 n  
 400 n  
 401 n  
 402 n  
 403 n  
 404 n  
 405 n  
 406 n  
 407 n  
 408 n  
 409 n  
 410 n  
 411 n  
 412 n  
 413 n  
 414 n  
 415 n  
 416 n  
 417 n  
 418 n  
 419 n  
 420 n  
 421 n  
 422 n  
 423 n  
 424 n  
 425 n  
 426 n  
 427 n  
 428 n  
 429 n  
 430 n  
 431 n  
 432 n  
 433 n  
 434 n  
 435 n  
 436 n  
 437 n  
 438 n  
 439 n  
 440 n  
 441 n  
 442 n  
 443 n  
 444 n  
 445 n  
 446 n  
 447 n  
 448 n  
 449 n  
 450 n  
 451 n  
 452 n  
 453 n  
 454 n  
 455 n  
 456 n  
 457 n  
 458 n  
 459 n  
 460 n  
 461 n  
 462 n  
 463 n  
 464 n  
 465 n  
 466 n  
 467 n  
 468 n  
 469 n  
 470 n  
 471 n  
 472 n  
 473 n  
 474 n  
 475 n  
 476 n  
 477 n  
 478 n  
 479 n  
 480 n  
 481 n  
 482 n  
 483 n  
 484 n  
 485 n  
 486 n  
 487 n  
 488 n  
 489 n  
 490 n  
 491 n  
 492 n  
 493 n  
 494 n  
 495 n  
 496 n  
 497 n  
 498 n  
 499 n  
 500 n



**Table:** Summary of NO-release data from **poly1** corresponding to Figure 1<sup>a</sup>

| Time (h) | Average NO release<br>( $\times 10^{-6}$ mol/mg) | Standard Deviation<br>( $\times 10^{-6}$ mol/mg) |
|----------|--------------------------------------------------|--------------------------------------------------|
| 21       | 0                                                | 0                                                |
| 48       | 0.00046                                          | 0.00003                                          |
| 72       | 0.0014                                           | 0.0004                                           |
| 98       | 0.0018                                           | 0.0003                                           |
| 121      | 0.0021                                           | 0.0002                                           |
| 171      | 0.0025                                           | 0.0003                                           |
| 263      | 0.0028                                           | 0.0005                                           |
| 430      | 0.0040                                           | 0.0006                                           |
| 574      | 0.0063                                           | 0.0008                                           |
| 623      | 0.0084                                           | 0.0008                                           |
| 725      | 0.0089                                           | 0.0008                                           |
| 837      | 0.0112                                           | 0.0009                                           |
| 934      | 0.0112                                           | 0.0008                                           |
| 1038     | 0.0123                                           | 0.0009                                           |
| 1173     | 0.0136                                           | 0.0009                                           |
| 1274     | 0.015                                            | 0.001                                            |
| 1368     | 0.017                                            | 0.001                                            |
| 1474     | 0.018                                            | 0.001                                            |
| 1584     | 0.019                                            | 0.001                                            |
| 1703     | 0.021                                            | 0.001                                            |
| 1945     | 0.0218                                           | 0.0005                                           |

<sup>a</sup> average and standard deviation based on n=3 samples.
